# Supplementary material for: Associations of Prenatal and Postnatal Maternal Depressive Symptoms with Offspring Cognition and Behavior in Mid-Childhood: A Prospective Cohort Study
Source: PubMed Central journal article supplement (PMC6466510; doi:10.3390/ijerph16061007), 2019-03-20
Supplement: ijerph-16-01007-s001.pdf [file ijerph-16-01007-s001.pdf]

# Associations of Prenatal and Postnatal Maternal Depressive Symptoms with Offspring Cognition and Behavior in Mid-Childhood: A Prospective Cohort Study

Sabrina Faleschini, Sheryl L. Rifas-Shiman, Henning Tiemeier, Emily Oken and Marie-France Hivert

**Table S1.** Associations of maternal depressive symptoms in mid-pregnancy with mother-rated behavioral outcomes in mid-childhood ( $n = 1225$ ).

|                                                       | Model 1             | Model 2<br>$\beta$ (95% CI) | Model 3             |
|-------------------------------------------------------|---------------------|-----------------------------|---------------------|
| <b>Behavior and executive function – Mother-rated</b> |                     |                             |                     |
| BRIEF Global Executive Composite                      | 2.60 (0.70, 4.50)   | 2.02 (0.06, 3.97)           | 1.97 (0.00, 3.93)   |
| BRIEF Behavior Regulation Index                       | 2.76 (0.90, 4.61)   | 2.13 (0.22, 4.05)           | 2.11 (0.18, 4.03)   |
| BRIEF Metacognition Index                             | 2.03 (0.21, 3.86)   | 1.59 (-0.27, 3.46)          | 1.54 (-0.34, 3.42)  |
| SDQ Total Difficulties                                | 2.63 (1.60, 3.65)   | 1.96 (0.92, 2.99)           | 1.98 (0.95, 3.02)   |
| SDQ Prosocial                                         | -0.21 (-0.57, 0.16) | -0.18 (-0.55, 0.19)         | -0.18 (-0.55, 0.20) |
| SDQ Hyperactivity                                     | 0.69 (0.18, 1.19)   | 0.48 (-0.03, 0.98)          | 0.47 (-0.03, 0.98)  |
| SDQ Emotional problems                                | 0.75 (0.38, 1.11)   | 0.55 (0.18, 0.92)           | 0.56 (0.18, 0.93)   |
| SDQ Conduct problems                                  | 0.44 (0.16, 0.73)   | 0.33 (0.04, 0.62)           | 0.34 (0.05, 0.63)   |
| SDQ Peer problems                                     | 0.75 (0.45, 1.05)   | 0.60 (0.30, 0.90)           | 0.61 (0.31, 0.91)   |

Note. Model 1. Unadjusted; Model 2. Adjusted for maternal race/ethnicity, age at enrollment, education, household income, pre-pregnancy BMI, and smoking during pregnancy and child sex; Model 3. Model 2 additionally adjusted for maternal IQ (KBIT-2).

**Table S2.** Associations of maternal depressive symptoms at 6 months postpartum with offspring behavioral and cognitive outcomes in mid-childhood in the Project Viva cohort ( $n = 1225$ ).

|                                        | Model 1             | Model 2             | Model 3             | Model 4             |
|----------------------------------------|---------------------|---------------------|---------------------|---------------------|
|                                        | $\beta$ (95% CI)    |                     |                     |                     |
| <b>Behavior and executive function</b> |                     |                     |                     |                     |
| <b>Teacher-rated</b>                   |                     |                     |                     |                     |
| BRIEF Global Executive Composite       | 2.78 (0.18, 5.39)   | 1.11 (-1.49, 3.71)  | 1.18 (-1.42, 3.78)  | 0.62 (-2.08, 3.32)  |
| BRIEF Behavior Regulation Index        | 2.42 (-0.26, 5.10)  | 1.07 (-1.63, 3.77)  | 1.05 (-1.65, 3.75)  | 0.41 (-2.40, 3.22)  |
| BRIEF Metacognition Index              | 2.86 (0.21, 5.50)   | 1.20 (-1.44, 3.84)  | 1.31 (-1.32, 3.95)  | 0.91 (-1.83, 3.65)  |
| SDQ Total Difficulties                 | 1.46 (0.07, 2.86)   | 0.74 (-0.62, 2.10)  | 0.77 (-0.59, 2.13)  | 0.45 (-0.98, 1.88)  |
| SDQ Prosocial                          | -0.43 (-0.99, 0.14) | -0.33 (-0.88, 0.22) | -0.34 (-0.89, 0.21) | -0.34 (-0.92, 0.23) |
| SDQ Hyperactivity                      | 0.46 (-0.23, 1.15)  | 0.11 (-0.56, 0.77)  | 0.14 (-0.53, 0.80)  | 0.03 (-0.66, 0.71)  |
| SDQ Emotional problems                 | 0.32 (-0.11, 0.75)  | 0.24 (-0.20, 0.68)  | 0.24 (-0.20, 0.68)  | 0.13 (-0.33, 0.59)  |
| SDQ Conduct problems                   | 0.45 (0.02, 0.88)   | 0.25 (-0.18, 0.68)  | 0.26 (-0.17, 0.69)  | 0.21 (-0.25, 0.66)  |
| SDQ Peer problems                      | 0.23 (-0.18, 0.63)  | 0.14 (-0.26, 0.55)  | 0.14 (-0.27, 0.54)  | 0.08 (-0.34, 0.50)  |
| <b>Mother-rated</b>                    |                     |                     |                     |                     |
| BRIEF Global Executive Composite       | 1.92 (0.00, 3.84)   | 1.20 (-0.77, 3.18)  | 1.15 (-0.83, 3.14)  | 0.67 (-1.44, 2.78)  |
| BRIEF Behavior Regulation Index        | 2.52 (0.62, 4.43)   | 1.95 (-0.01, 3.91)  | 1.93 (-0.04, 3.90)  | 1.47 (-0.64, 3.59)  |
| BRIEF Metacognition Index              | 1.06 (-0.81, 2.92)  | 0.37 (-1.54, 2.28)  | 0.31 (-1.60, 2.22)  | -0.12 (-2.13, 1.90) |
| SDQ Total Difficulties                 | 1.47 (0.44, 2.51)   | 0.63 (-0.41, 1.67)  | 0.65 (-0.39, 1.69)  | 0.12 (-0.98, 1.22)  |
| SDQ Prosocial                          | -0.22 (-0.59, 0.16) | -0.15 (-0.52, 0.23) | -0.15 (-0.52, 0.22) | -0.11 (-0.50, 0.28) |
| SDQ Hyperactivity                      | 0.16 (-0.35, 0.67)  | -0.15 (-0.65, 0.36) | -0.15 (-0.66, 0.35) | -0.30 (-0.84, 0.23) |
| SDQ Emotional problems                 | 0.61 (0.24, 0.97)   | 0.42 (0.05, 0.80)   | 0.43 (0.06, 0.80)   | 0.30 (-0.09, 0.69)  |
| SDQ Conduct problems                   | 0.13 (-0.14, 0.40)  | -0.02 (-0.30, 0.25) | -0.01 (-0.29, 0.26) | -0.11 (-0.41, 0.18) |
| SDQ Peer problems                      | 0.58 (0.25, 0.90)   | 0.37 (0.04, 0.70)   | 0.38 (0.05, 0.71)   | 0.23 (-0.11, 0.57)  |
| <b>Cognition</b>                       |                     |                     |                     |                     |
| KBIT-2 Verbal                          | -2.83 (-6.32, 0.66) | 1.38 (-1.79, 4.54)  | 0.86 (-2.26, 3.97)  | 1.32 (-1.99, 4.64)  |
| KBIT-2 Non-verbal                      | -0.09 (-3.74, 3.56) | 2.08 (-1.56, 5.71)  | 1.70 (-1.90, 5.31)  | 2.31 (-1.43, 6.06)  |
| WRAVMA Visual-Motor                    | -2.64 (-6.21, 0.94) | -1.45 (-5.03, 2.13) | -1.64 (-5.23, 1.96) | -1.76 (-5.44, 1.92) |
| WRAML Design memory                    | 0.31 (-0.29, 0.91)  | 0.55 (-0.07, 1.16)  | 0.52 (-0.10, 1.13)  | 0.62 (-0.02, 1.25)  |
| WRAML Picture memory                   | 0.31 (-0.39, 1.02)  | 0.52 (-0.21, 1.25)  | 0.52 (-0.21, 1.25)  | 0.41 (-0.34, 1.17)  |
| WRAML Visual memory, global score      | 0.63 (-0.35, 1.60)  | 1.07 (0.07, 2.07)   | 1.04 (0.03, 2.04)   | 1.03 (-0.01, 2.07)  |

Note. Model 1. Unadjusted; Model 2. Adjusted for maternal race/ethnicity, age at enrollment, education, household income, pre-pregnancy BMI, and smoking during pregnancy and child sex, gestation length, birth weight/gestational age z-score and breastfeeding duration at 6 months; Model 3. Model 2 additionally adjusted for maternal IQ (KBIT-2); Model 4. Model 3 additionally adjusted for mid-pregnancy probable depression.

**Table S3.** Associations of maternal depressive symptoms at 12 months postpartum with offspring behavioral and cognitive outcomes in mid-childhood in the Project Viva cohort ( $n = 1225$ ).

|                                        | Model 1              | Model 2             | Model 3             | Model 4              |
|----------------------------------------|----------------------|---------------------|---------------------|----------------------|
|                                        | $\beta$ (95% CI)     |                     |                     |                      |
| <b>Behavior and executive function</b> |                      |                     |                     |                      |
| <b>Teacher-rated</b>                   |                      |                     |                     |                      |
| BRIEF Global Executive Composite       | 4.39 (1.48, 7.30)    | 2.05 (-0.84, 4.93)  | 2.11 (-0.77, 4.99)  | 1.45 (-1.64, 4.53)   |
| BRIEF Behavior Regulation Index        | 4.45 (1.49, 7.42)    | 2.62 (-0.39, 5.63)  | 2.61 (-0.40, 5.62)  | 1.99 (-1.28, 5.26)   |
| BRIEF Metacognition Index              | 3.83 (0.83, 6.83)    | 1.46 (-1.52, 4.43)  | 1.56 (-1.42, 4.53)  | 0.91 (-2.25, 4.07)   |
| SDQ Total Difficulties                 | 2.14 (0.47, 3.81)    | 1.41 (-0.23, 3.05)  | 1.45 (-0.19, 3.09)  | 1.08 (-0.65, 2.82)   |
| SDQ Prosocial                          | -0.35 (-0.98, 0.28)  | -0.32 (-0.96, 0.32) | -0.33 (-0.97, 0.31) | -0.26 (-0.94, 0.41)  |
| SDQ Hyperactivity                      | 0.78 (-0.07, 1.62)   | 0.47 (-0.34, 1.27)  | 0.50 (-0.31, 1.30)  | 0.43 (-0.42, 1.27)   |
| SDQ Emotional problems                 | 0.45 (-0.06, 0.96)   | 0.33 (-0.19, 0.86)  | 0.33 (-0.19, 0.86)  | 0.19 (-0.37, 0.76)   |
| SDQ Conduct problems                   | 0.63 (0.18, 1.08)    | 0.42 (-0.04, 0.88)  | 0.42 (-0.04, 0.88)  | 0.36 (-0.13, 0.84)   |
| SDQ Peer problems                      | 0.29 (-0.19, 0.76)   | 0.20 (-0.29, 0.69)  | 0.19 (-0.30, 0.68)  | 0.11 (-0.43, 0.65)   |
| <b>Mother-rated</b>                    |                      |                     |                     |                      |
| BRIEF Global Executive Composite       | 2.96 (0.83, 5.09)    | 2.32 (0.10, 4.55)   | 2.29 (0.06, 4.51)   | 1.79 (-0.60, 4.18)   |
| BRIEF Behavior Regulation Index        | 3.38 (1.35, 5.42)    | 2.85 (0.73, 4.97)   | 2.84 (0.72, 4.97)   | 2.17 (-0.11, 4.46)   |
| BRIEF Metacognition Index              | 2.03 (-0.03, 4.09)   | 1.50 (-0.65, 3.66)  | 1.46 (-0.70, 3.61)  | 1.15 (-1.15, 3.46)   |
| SDQ Total Difficulties                 | 2.56 (1.39, 3.73)    | 1.69 (0.51, 2.88)   | 1.71 (0.53, 2.89)   | 1.20 (-0.10, 2.50)   |
| SDQ Prosocial                          | -0.13 (-0.53, 0.27)  | -0.13 (-0.54, 0.27) | -0.13 (-0.54, 0.27) | -0.03 (-0.47, 0.41)  |
| SDQ Hyperactivity                      | 0.84 (0.27, 1.40)    | 0.57 (0.00, 1.13)   | 0.56 (-0.01, 1.13)  | 0.53 (-0.08, 1.15)   |
| SDQ Emotional problems                 | 0.74 (0.33, 1.14)    | 0.52 (0.10, 0.94)   | 0.53 (0.11, 0.95)   | 0.35 (-0.11, 0.81)   |
| SDQ Conduct problems                   | 0.45 (0.14, 0.77)    | 0.32 (-0.01, 0.65)  | 0.33 (0.00, 0.66)   | 0.27 (-0.09, 0.63)   |
| SDQ Peer problems                      | 0.54 (0.19, 0.89)    | 0.29 (-0.07, 0.65)  | 0.30 (-0.06, 0.66)  | 0.05 (-0.33, 0.44)   |
| <b>Cognition</b>                       |                      |                     |                     |                      |
| KBIT-2 Verbal                          | -7.59 (-11.6, -3.61) | -1.56 (-5.09, 1.97) | -2.00 (-5.49, 1.49) | -2.21 (-5.95, 1.54)  |
| KBIT-2 Non-verbal                      | -3.02 (-7.13, 1.10)  | 0.20 (-3.92, 4.32)  | -0.12 (-4.19, 3.96) | 0.12 (-4.30, 4.55)   |
| WRAVMA Visual-Motor                    | -3.73 (-7.87, 0.41)  | -2.56 (-6.83, 1.71) | -2.72 (-6.99, 1.55) | -2.60 (-7.27, 2.08)  |
| WRAML Design memory                    | -0.26 (-0.96, 0.43)  | 0.00 (-0.71, 0.71)  | -0.03 (-0.74, 0.68) | -0.12 (-0.88, 0.63)  |
| WRAML Picture memory                   | -0.64 (-1.41, 0.13)  | -0.53 (-1.32, 0.27) | -0.53 (-1.33, 0.26) | -0.93 (-1.79, -0.08) |
| WRAML Visual memory, global score      | -0.90 (-2.02, 0.21)  | -0.53 (-1.66, 0.61) | -0.56 (-1.70, 0.57) | -1.06 (-2.27, 0.16)  |

Note. Model 1. Unadjusted; Model 2. Adjusted for maternal race/ethnicity, age at enrollment, education, household income, pre-pregnancy BMI, and smoking during pregnancy and child sex, gestation length, birth weight/gestational age z-score and breastfeeding duration at 12 months; Model 3. Model 2 additionally adjusted for maternal IQ (KBIT-2); Model 4. Model 3 additionally adjusted for probable depression in mid-pregnancy and 6 months postpartum.
